# Supplementary material
Source: publisher site journal article supplement (https://www.spandidos-publications.com/6798/downloadSupplementary)
Supplement: Supplementary file 1 [file downloadSupplementary]

## Sheet: Sheet1
Table SV. Target list of piwi-interacting RNAs.
Upregulated	Downregulated
GRAMD4	AACSP1
AC105402.3	ABCA3
AHSA2P	ABCA8
ABLIM3	ABR
ATP5PDP4	ADAM11
CCND1	ADAM20P3
FOXRED2	ADAMTS7P3
LAMC2	ADAMTSL1
KIAA1217	ADAMTSL3
SLC40A1	ADI1
PITPNC1	AGO2
STRBP	AK6P1
ACTN4	AK6P2
AC079922.1	AKNA
POLR2L	AKR7A2
SDF4	AKR7A2P1
ACACB	ALKBH2
ATP5PD	AMBRA1
ACTG1	AMOT
HIST1H1D	ANAPC1
PPRA	ANKLE2
PRDX1	AP1M1
NA	ARHGAP19
UQCRQ	ARHGAP19-SLIT1
AC024230.1	ARHGEF7
AC008038.1	ARL1
ACTB	ARMC6
AC136632.1	ASPHD1
AC138207.8	ATP5PO
AGAP1	AVL9
MT-TF	BAIAP2
AP002990.1	BAZ1B
CHCD	BHLHE40
EEF1G	BIN1
RPL19	BRD2
DGKI	BSPRY
HERC2	BTN2A2
IL6ST	BTNL9
AAMP	C1orf116
AASDHPPT	C1orf122
ABCB11	C1orf216
ABCB8	C22orf23
ABCC10	C5orf24
ABCC3	C8orf74
ABHD14B	C8orf82
ABHD17A	CACNA2D4
ACAD10	CADPS
ACADS	CAP2P1
ACAP2	CAPN13
ACAT2	CARD14
ACCS	CAV3
ACHE	CBLL1P1
ACSF3	CBS
ACTB	CBY2
ACTBP1	CCDC112
ACTBP11	CCDC17
ACTBP15	CCDC18
ACTBP2	CCDC27
ACTBP8	CCDC40
ACTBP9	CCR3
ACTG1P1	CD151
ACTG1P10	CD276
ACTG1P14	CDRT15P12
ACTG1P15	CELSR3
ACTG1P22	CES5A
ACTG1P23	CFAP251
ACTG1P24	CFAP47
ACTG1P25	CHERP
ACTG1P3	CLEC16A
ACTG1P4	CLEC18A
ACTG1P9	CLUH
ACTG2	CLXN
ACTN4P1	CMTR2
ACTR1A	CNTLN
ACTR1B	COL10A1
ADAMTS12	COL16A1
ADAMTS13	COL4A5
ADAMTS2	COL4A6
ADAMTSL3	COL6A4P1
ADAMTSL4	COL6A6
ADAMTSL5	COL7A1
ADAT3	COPB2
ADCK1	COTL1
ADCK5	COX4I1
ADCY2	COX6A1
ADCY5	CPN2
ADCY6	CPT1C
ADCY7	CRELD2
ADD1	CYB5R2
ADGRB2	CYP2E1
ADGRF5	DAB2IP
ADGRG3	DAXX
ADGRG5	DERL3
ADGRV1	DHX30
ADI1	DMGDH
ADTRP	DNAH10
AEBP1	DNAH17
AFAP1	DNAH3
AFAP1L2	DNAH5
AGAP2	DPP3P1
AGPAT4	DPRXP7
AHCTF1	DUSP19
AHCTF1P1	DUSP4
AHNAK2	DUSP5P1
AK4P4	DUXAP2
AKAP1	DUXAP3
AKAP8L	DUXAP4
AKNA	DUXAP6
AKT1	DUXAP7
AKT3	EEF1GP4
ALDH1A2	EFCAB12
ALDH1A3	ELAPOR2
ALDH3A2	EMID1
ALDOA	ERVFRD-1
ALG1	ESPL1
ALG1L9P	ETS2
ALOX5	EXTL3
AMDHD2	FAAP100
AMHR2	FAM217A
AMIGO1	FASN
AMMECR1	FBLN5
AMOTL2	FBXW10
AMY2B	FHIP1B
ANAPC5	FHIT
ANGPTL2	FKBP1AP2
ANKFY1	FLOT2
ANKLE1	FNDC1
ANKRD11	FNDC5
ANKRD11P1	FOXN3P1
ANKRD33BP10	FRMD4B
ANKRD33BP2	FSHB
ANKRD33BP7	FSTL3
ANKRD52	G6PD
ANO7	GABRR2
AOC1	GALNT17
AOC4P	GAPDHP23
AP1B1	GAPDHP25
AP1M1	GAPDHP51
AP1S1	GAPDHP55
AP2B1	GAPDHP62
AP3S1	GAPDHP70
APBA2	GFPT2
APBB1	GGT8P
APLP2	GIMAP4
APOBEC3G	GLB1L3
APP	GNAI2P2
APRG1	GPT2
AQP10	GSDMD
AQP5	GTF2IRD2
ARAF	GUCD1
ARHGAP1	GUCY1B2
ARHGAP12	GUSB
ARHGAP22	H6PD
ARHGAP24	HDAC1P1
ARHGAP35	HERPUD1
ARHGAP39	HIBADH
ARHGDIG	HLA-K
ARHGEF16	HNRNPH3
ARHGEF28	HOXC4
ARHGEF34P	HSP90AA2P
ARID4B	HSP90AB2P
ARL5C	HSPA1A
ARMC5	HSPA1B
ARMCX3	HSPA7
ARPC1A	HSPA8P6
ARPIN	ICAM5
ARRDC5	IFI27L1
ARSA	IGDCC4
ASAP3	IGF2
ASL	IGLV10-67
ASS1P12	IGSF22
ASTN1	IL20RA
ATG13	IL34
ATG14	IL9RP4
ATL3	ILF2P2
ATP10B	IQSEC2
ATP11A	ITGB6
ATP13A3	KBTBD4
ATP1A2	KEAP1
ATP5MJ	KIF2C
ATP5PD	KLC4
ATP6V0A2	KLHL33
ATP6V1A	KLHL38
ATP8A1	KRT7
ATP8A2	KRT8P34
ATP8B4	KRT8P46
ATRNL1	LARGE2
ATXN7	LCAT
ATXN7L3	LCK
B4GALNT3	LDC1P
BACE2	LDLRAD4
BAG6	LINC02312
BAZ2A	LPIN3
BAZ2B	LRFN5
BCL2L13	LRP2
BCL9L	LRRC66
BCL9P1	LRRC8E
BCR	LTB4R2
BDH1	LZTFL1
BDKRB2	MACF1
BEND6	MACROD1
BEX4	MAP4K1
BFAR	MARK2P8
BFSP2	MBIP
BICD1	MC1R
BICD2	MFSD10
BICDL1	MIB2
BLMH	MICAL3
BMAL1	MICB
BOC	MICC
BPIFB1	MICE
BPIFB4	MICG
BPTF	MPV17
BRD1	MPZL1
BRD3	MSANTD4
BTBD6	MSR1
BTBD6P1	MSTO2P
BTNL9	MTCL1
BUB1	MTCO1P14
C11orf16	MTCO1P23
C11orf58	MTCO2P12
C12orf60	MTCO2P2
C17orf99	MTCO2P22
C19orf12	MTCO3P30
C19orf25	MTERF2
C19orf44	MYLK
C19orf67	MYO15A
C1orf116	MYO15B
C1orf162	NACC1
C1orf220	NBPF21P
C21orf58	NBPF2P
C21orf62	NBPF3
C2CD2	NCMAP
C2CD6	NCR2
C2orf50	NDUFAF3
C3	NEK8
C4orf46	NEURL1
C6orf136	NOTCH3
CA4	NPRL2
CACHD1	NSD3
CACNA1F	NUP210L
CACNA2D2	NXPH3
CACTIN	OLFML2A
CADPS	OR6C70
CALCA	OR6K1P
CALCB	OVOL1
CAMKK1	PAQR8
CAMSAP3	PAX2
CAPN9	PAX4
CAPNS1P1	PCMTD2
CARD19	PDE4B
CARD8	PDHA1P1
CARMIL3	PDXK
CARNS1	PEG10
CARS2	PEX5
CASC3	PFN4
CASKIN2	PGGHG
CASP1P1	PGPEP1
CASP1P2	PHETA1
CASP2	PHF1
CASP9	PHF5A
CASQ1	PHF5AP4
CASS4	PHKB
CAST	PHYHIPL
CASZ1	PI4KB
CBLL1P1	PIGG
CBLN2	PIK3R2
CCDC12	PIMREGP3
CCDC159	PLCH2
CCDC166	PLEKHD1
CCDC180	PNMA2
CCDC25	POLR2F
CCDC33	PPFIBP2
CCDC40	PPM1H
CCDC74B	PPP1R26P1
CCDC80	PPP1R3B
CCDC9B	PRG4
CCL26	PRPF8
CCNB2	PRR3
CCNF	PRRT3
CCNYL1	PSMG4
CCR7	PTK2B
CCR9	PTPRA
CCS	RAI14
CCT5	RAI2
CCT8L1P	RAMP2
CCZ1	RANBP20P
CD151	RANGRF
CD177P1	RAP1GAP2
CD1E	RAPSN
CD300LD-AS1	RASAL3
CD320	RBP1
CD47	RELL1
CD6	RELT
CD81	RGL4
CDC42EP2	RHBDD2
CDH15	RNF220
CDH24	RNF39
CDH5	RPH3A
CDHR1	RPL23AP56
CDK18	RPS3AP9
CEACAM19	RRP1
CELA2A	RSPH1
CENPBD2P	SAGE2P
CENPL	SAGE4P
CENPT	SALL4
CENPX	SCAMP3
CEP135	SDSL
CEP152	SEC24D
CEP250	SEPTIN8
CEP68	SERINC4
CEP72	SERPINA6
CEP83	SEZ6
CEP85	SFI1
CEP95	SGSM2
CERS2	SH2D3A
CERS5	SHC1
CES2	SHC1P1
CFAP157	SHROOM4
CFAP251	SIDT2
CFAP74	SIGLEC7
CFL1P1	SIGLECL1
CFLAR	SIPA1L2
CGN	SLC16A4
CHAC1	SLC25A44
CHCHD2	SLC27A5
CHCHD2P1	SLC34A1
CHCHD2P6	SLC37A3
CHCHD2P8	SLC6A9
CHCHD5	SLC7A3
CHD7	SLC8B1
CHD8	SLITRK2
CHIA	SMAD3
CHKA	SMC4
CHN1	SMLR1
CHRNB1	SNX8
CHST8	SP1
CHSY1	SPATA31E2P
CIAO2B	SPATA6
CINP	SPHK1
CISD1	SPICE1
CISH	SPNS2
CKMT2	SPRN
CLCN7	SREBF1
CLDN10	SRGAP1
CLDN14	STK33P1
CLEC2L	STRBP
CLEC4GP1	STX10
CLEC5A	SULT1A2
CLHC1	SYNE3
CLIP2	SZT2
CLK3	TACC2
CLMN	TAF1A
CLN6	TAF9P3
CLNK	TARS2P1
CLSTN3	TBC1D4
CLTA	TBC1D9B
CNTN4	TBR1
COA1	TCAF1
COA8	TCF20
COL11A2	TECPR1
COL1A1	TENM4
COL28A1	TFR2
COL6A4P1	TGFBR2
COLCA1	TGM2
COMP	TKFC
COPB2	TMCC3
COPS6	TMEM131
COPZ2	TMEM78
COQ4	TMEM94
COQ5	TNKS1BP1
COQ8A	TNNI1
CORO1A	TPRG1L
COX14	TRAPPC6A
COX6A1	TRIM37
COX6C	TRIM7
CPNE4	TRIO
CPOX	TRPV3
CPSF1	TTC4P1
CPSF1P2	TUBGCP3
CPSF3	TYRO3
CRACR2B	UBE3C
CREB3	USP32
CREBBP	UTP14A
CRIP1	VAT1
CRLF1	VCPKMT
CRTC2	VPS26B
CRY2	VPS4A
CRYBB2P1	VSIG2
CRYM	WDR55
CSF1	WRAP53
CSMD1	WRNIP1
CSPG4	XYLT2
CSPG4P3Y	YPEL4
CSPG4P4Y	ZBTB22
CSPG4P5	ZFHX2
CSRNP3	ZFP91-CNTF
CSRP2	ZFX
CTDSPL	ZNF302
CTDSPL2	ZNF526
CTIF	ZNF542P
CTNNBL1	ZNF568
CTRL	ZNF660
CTSG	ZNF681
CTTN	ZNF683
CUL9	ZNF746
CWC22	ZNF76
CX3CR1	ZSCAN32
CXCR6	ZSWIM8
CXXC4	RNA45SN1
CYP11B1	PARD3B
CYP11B2	LINC00317
CYP27A1	RNA5-8SN4
CYP2C9
CYP2E1
CYP3A5
CYP4B1
CYP51A1P3
CYRIB
CYYR1
D2HGDH
DAB2IP
DACT3
DAGLA
DAND5
DAPK2
DAXX
DBF4B
DBR1
DCAF12
DCAF5
DCAF8
DCC
DCLRE1C
DCLRE1CP1
DCPS
DCTN1
DCUN1D3
DDI2
DDX10
DDX23
DDX39B
DDX3P1
DDX41
DDX50P1
DDX51
DEK
DESI1
DGKD
DHRS1
DHRS7B
DHX36
DHX8
DIAPH1
DIS3L2
DLEC1
DLL4
DLX6
DMAC2L
DMWD
DMXL2
DNAH1
DNAH17
DNAH3
DNAH9
DNAJA3
DNAJB13
DNAJB8
DNAJC22
DNAJC24
DNLZ
DNM1P49
DNMT3B
DNPEP
DOC2A
DOCK2
DOCK6
DOP1A
DPEP2
DPH6
DPP8
DPY19L1
DPY19L1P1
DPY19L2P3
DPYSL5
DRG2
DSCAM
DTX2
DUS1L
DUS3L
DUSP22
DUSP3
DUSP5
DUSP5P1
DUSP8
DXO
ECI1
EDC4
EEF1A1P48
EFCAB12
EFEMP2
EFNA4
EIF2AK4
EIF4BP2
EIF4BP7
ELF2P1
ELF2P3
ELF2P4
ELL3
ELOCP33
ELP5
EMSY
ENO1
ENPP7P11
ENPP7P3
ENPP7P4
ENPP7P6
ENPP7P9
ENTPD8
EPHA5
ERC2
ERCC3
ERFE
ERG
ERI1
ERICH1
ERP29
ERVFRD-3
ESPL1
ETFB
ETNK2
ETV1
EVC
EVL
EWSR1
EXOC3
EXOSC2
EXTL3
FABP7
FADS2
FAM107B
FAM110B
FAM120AOS
FAM131A
FAM135A
FAM13C
FAM149B1
FAM193B
FAM207BP
FAM219B
FAM222A
FAM47DP
FAM72A
FAM78A
FAM83F
FAM83H
FAM86B1
FAM86C2P
FAM89A
FANCC
FAR2
FAT3
FAT4
FBLN7
FBXL16
FBXL18
FBXL19
FBXL7
FBXO27
FBXO3
FBXW9
FCGRT
FCN3
FCRL5
FDFT1
FDPS
FERMT1
FFAR3
FGD5
FGF2
FGF5
FGFR1
FGFR3
FGFR3P6
FGFRL1
FGR
FITM1
FIZ1
FKBPL
FLAD1
FLCN
FLG2
FLII
FLJ40288
FLOT1
FLRT1
FMN1
FMO10P
FMO8P
FNBP1
FNBP1P1
FNDC1
FNTA
FOXJ2
FOXK1
FOXM1
FREM3
FRG2IP
FRG2KP
FRY
FSCN1
FSD2
FXR2
FZR1
G6PC3
GAB2
GABRB2
GAK
GALE
GALNT14
GALNT16
GALNT17
GALNT2
GALNT7
GALNT9
GANAB
GAPDHP25
GAPDHP31
GAPDHP46
GAPDHP47
GAPDHP51
GAPDHP58
GAPDHP64
GAPDHP71
GARNL3
GARRE1
GAS6
GAS7
GBA2
GCDH
GDI1
GEMIN4
GFM1
GFOD2
GFPT1
GFPT2
GFRA2
GFUS
GGA2
GJA4
GLDN
GLI1
GLI4
GLIPR1
GLMN
GLYATL1P1
GMPR2
GNAI2P2
GNB2
GNL1
GNLY
GNRH1
GOLPH3
GP5
GP6
GPAM
GPATCH8
GPR132
GPR148
GPR156
GPR18
GPR42
GPR78
GPR82
GPS1
GPSM1
GPT2
GPX8
GRAMD1A
GRB10
GRHPR
GRIA4
GRIK3
GRIN2C
GRINA
GRK6
GRK6P1
GRM4
GSDMA
GSDME
GSTM1
GSTM2
GSTM4
GSTO1
GSTO2
GSTT2B
GSTZ1
GTF2IRD1
GTF2IRD1P1
GTF2IRD2
GTF3C1
GTPBP3
GTSF1L
GUCY1A1
GYG1
H2AC2P
H2AC3P
H2AC6
H2AJ
H2AX
H3C12
H6PD
HACE1
HAPLN4
HAUS7
HAUS8
HBA2
HBP1
HBS1L
HCFC1
HDAC1
HDAC10
HDAC4
HDAC4-AS1
HDHD2
HDLBP
HEATR4
HELZ2
HEMK1
HEPH
HERC6
HES6
HIC2
HIGD1B
HK2
HLA-DOB
HLA-DQA2
HLA-DQB1
HLA-V
HMG20A
HMG20B
HMGA1
HMGA1P1
HMGCL
HNF1A
HNF4A
HNRNPA1P18
HNRNPA1P54
HNRNPCP4
HNRNPD
HOXB6
HPRT1
HPRT1P3
HPS4
HR
HRK
HROB
HSP90AB7P
HSPB1
HTR3A
HTRA3
ICAM2
ICOS
IFI35
IFITM3P1
IFT122
IFT140
IGF1R
IGF2BP3
IGFN1
IGHV2-26
IGHVIII-76-1
IGKC
IGLVI-56
IGLVIV-53
IKBKE-AS1
IKZF1
IL12RB1
IL1RL2
IL27
ILRUNP1
IMMP1L
IMMT
IMP4
IMPA2
INF2
ING5
INHA
INHBA
INHCAP
INO80E
INPP4A
INPP4B
INPP5D
INTS9
IP6K1
IPO5
IPO8
IQCF1
IQCH
IRF1
IRF3
IRX1P1
ISG20
ISL1
ISM2
ISY1-RAB43
ISYNA1
ITGAV
ITGAX
ITGB4
ITPRIP
IZUMO1
IZUMO2
JAK3
JAKMIP2
JAKMIP3
JDP2
KAT6B
KBTBD3
KCNAB3
KCNH6
KCNIP3
KCNJ5
KCNMB1
KCNQ3
KCNQ4
KDM3B
KDM4E
KDM8
KDSR
KHDC4
KHDRBS1
KIAA0040
KIAA0513
KIAA1755
KIAA2012
KIF15
KIF19
KIF1A
KIF1B
KIF21A
KIF21B
KIF26A
KIF26B
KIF3C
KIF9
KIFC2
KIFC3
KL
KLC1
KLC4
KLF17
KLF6
KLHDC8B
KLHL24
KLHL28
KLK3
KPNA2P1
KRBOX5
KRT15
KRT37
KRT83
KRT84
KRTAP2-3
KRTAP2-4
KSR1
LAIR1
LAMA1
LAMC3
LAMP3
LAS1L
LCAT
LCK
LCN1P1
LCORL
LCP2
LCTL
LDAF1
LDLRAD4
LGALS12
LGI2
LGR6
LIG1
LILRP1
LIMS1
LIMS3
LIMS4
LIN7C
LINC00174
LINC02693
LINC02914
LMBR1
LMF2
LNPEP
LNPK
LONRF2P1
LONRF2P2
LPCAT1
LPIN1
LRFN4
LRIG1
LRP10
LRRC15
LRRC37A9P
LRRC4C
LRRC74B
LRRC75A
LRRFIP1
LSM12
LSM12P1
LSM8
LSR
LSS
LY6D
LY6G5B
LY6K
LY75
LY75-CD302
LY9
LYPD3
LYPLA2
LYPLA2P1
LYPLA2P2
LYPLA2P3
LZTR1
LZTS1
MACF1
MACROD2
MAD1L1
MAD2L1P1
MAGEA2B
MALRD1
MAN2A2
MAOA
MAP3K10
MAP3K11
MAP3K7CL
MAP3K9
MAP7D1
MAPK8IP3
MAPKAP1
MAPT
MARCHF1
MARK2
MARK2P14
MASP1
MASP2
MAST1
MAST2
MATN3
MAU2
MBD1
MBP
MBTPS2
MCF2L
MCTP2
MCUR1
MDGA1
ME3
MED11
MED13
MED20
MED26
MED7
MEGF8
MEIOC
METTL13
METTL16
METTL6
MEX3B
MFF
MFNG
MFSD11
MFSD4A
MGA
MGAT5B
MGME1
MGRN1
MGST2
MIA2
MICAL2
MID1IP1
MIGA1
MINDY1
MINPP1
MIPEP
MIR670HG
MKNK1
MKRN2OS
MLKL
MLST8
MLX
MLXIP
MMS19
MOB2
MOB3A
MOCS1
MOCS1P1
MOGS
MORC3
MORC4
MOXD1
MPI
MPP1
MPRIP
MPST
MPV17L
MPV17L2
MRGPRX12P
MRO
MROH1
MROH8
MRPL2
MRPL21
MRPL36
MRPL46
MRPS14
MRPS22
MSLNL
MT1X
MTA3
MTBP
MTERF4
MTHFD1
MTIF3
MTMR14
MTND1P10
MTND6P32
MTRF1L
MTRF1LP1
MTSS1
MUC19
MUC21
MUC6
MUS81
MVK
MVP
MYBPC3
MYH14
MYL6
MYLK2
MYLK3
MYO15A
MYO1C
MYO7A
MYO7B
MYO9B
MYOM3
MYRF
MYZAP
MZF1
N4BP2L1
NAA15
NABP2
NADSYN1
NAGS
NAP1L6P
NAT16
NAV2
NBPF1
NCAPH
NCEH1
NCF1B
NCF1C
NCK1
NCK2
NCKAP1L
NCKAP5
NCLN
NDUFA13
NDUFV3
NECAP2
NECTIN2
NECTIN2P1
NEDD9
NEK8
NELFCD
NEO1
NF2
NFASC
NFATC4
NFIX
NFKB1
NFXL1
NFYAP1
NFYC
NGRN
NHLRC2
NIBAN2
NIBAN3
NID2
NIN
NIPSNAP3A
NKIRAS2
NLRC3
NLRC5
NLRP1
NLRP2
NLRP8
NMNAT1P3
NMT2
NOS1
NOS3
NPAP1P4
NPFFR2
NPHP4
NPHS1
NPHS2
NPIPB3
NRCAM
NRROS
NTNG1
NTPCR
NUDT14
NUP210P3
NUP214
NUP50
NUP85
NWD1
OACYLP
OGDHL
OGFOD2
OGG1
OGT
OLFML1
OLFML2B
OLIG1
OPRK1
OPRL1
OR10V2P
OR1P1
OR2G1P
OR52K3P
OR5AN1
OR7C1
OR7E115P
OR7E91P
OR8V1P
OR9G2P
ORAI3
ORC6
OTOA
OXCT1
OXCT2
P2RX5-TAX1BP3
P2RY10
P3H1
P3H2
P3H4
PA2G4
PADI3
PAFAH1B2
PAH
PALM2AKAP2
PAM
PAN3
PANK2
PAPOLA
PARK7
PARP12
PARP3
PASK
PBX1
PBX3
PCBP3
PCED1A
PCF11
PCGF6
PCID2
PCK2
PCMTD2
PCNPP1
PCNX3
PCSK2
PCSK9
PCYOX1L
PDE1B
PDE4A
PDE4B
PDE6B
PDGFB
PDLIM7
PDS5B
PDXK
PDZK1P1
PDZRN4
PEAR1
PEF1
PELP1
PER2
PERM1
PEX6
PFAS
PFKFB4
PGLS
PGM5
PHAX
PHF24
PHKA1
PHKA2
PHKG1
PHLDB3
PHTF1
PHYHIPL
PIERCE1
PIEZO1
PIF1
PIGFP1
PIGG
PIGL
PIGN
PIGO
PIH1D1
PIK3C2B
PIK3IP1
PIKFYVE
PINLYP
PIP5K1C
PITPNC1
PITPNM1
PITPNM2
PITPNM3
PJA2
PKHD1
PKMYT1
PKNOX1
PKP1
PKP3
PLA2G4C
PLA2G4D
PLA2G4F
PLCD4
PLD2
PLEKHA6
PLEKHD1
PLEKHG2
PLEKHG4
PLEKHM1
PLG
PLGLB2
PLPP3
PLPP7
PLXNA2
PLXNB1
PLXNB2
PMFBP1
PML
PMPCA
PMPCAP1
PNKD
PNPLA6
PNPLA7
PNPLA8
PNPT1P2
POC1B
POFUT2
POLB
POLI
POLR2A
POLR2B
POLR2D
POLR2E
POLR3DP1
POMGNT1
POP1
POP5
POR
POU2AF3
POU5F1P5
POU6F1
POU6F2
PPA1
PPAN
PPAN-P2RY11
PPARGC1B
PPFIBP2
PPIAP42
PPIAP53
PPIAP56
PPIAP78
PPP1R13B
PPP1R1A
PPP1R37
PPP2R5E
PRAM1
PRDM5
PRDM7
PRDX6
PRELID1P7
PRF1
PRKAG1
PRKD2
PRMT7
PRODHLP
PRPF38A
PRR14L
PRR3
PRR5L
PRRC2A
PRRT1
PRRX1
PRSS30P
PRSS36
PRSS46P
PRSS58
PRTN3
PSAP
PSG11
PSG4
PSG5
PSG6
PSG9
PSMA2
PSMD3
PSMD4
PSMD9
PSMG4
PSORS1C1
PSTPIP1
PTAFR
PTGES2
PTGIR
PTPA
PTPMT1
PTPN18
PTPN5
PTPRD
PTPRF
PTPRG
PTPRU
PUM1
PYCR2
PYGL
PYGM
PYGO2
QPCTL
QPRT
QRICH2
QRSL1
QSER1
RAB10
RAB11FIP5
RAB17
RAB29
RAB41
RAB42
RAET1G
RAI1
RALGAPA1P1
RALGAPA2
RALGAPB
RANBP17
RAPGEF3
RASGEF1B
RASL10A
RASSF2
RBFA
RBFOX3
RBIS
RBM19
RBM22P2
RBM33
RBM42
RBM4B
RCC2
RCC2P2
RCC2P5
RDH13
RECK
RELT
REPIN1
REPS2
RFC5
RFT1
RFX1
RGN
RGS3
RHBDD3
RHBDF1
RHPN2
RHPN2P1
RIC8A
RILPL1
RIPK3
RIPOR3
RIPPLY3
RMND5B
RNF103
RNF130
RNF14P4
RNF166
RNF19A
RNF213
RNF32-DT
RNPC3
RNPEPL1
RNPS1
RO60
RPAIN
RPAP1
RPGRIP1
RPIAP1
RPL18P11
RPL21P61
RPL22P17
RPL26P3
RPL27
RPL28
RPL30
RPL31
RPL34P21
RPL3L
RPL41
RPL7P34
RPL7P35
RPL7P41
RPL8
RPLP2
RPRD2
RPS21
RPS27AP12
RPS27AP2
RPS27AP3
RPS3A
RPS3P2
RPS6KA1
RPS6KL1
RPS9
RPSA
RPSAP13
RPSAP22
RPSAP28
RPSAP5
RPSAP66
RPUSD1
RPUSD4
RSAD2
RSRC1
RSRC2
RTL9
RUFY1
RUNX1
RUSF1
RXRA
RXRB
S100A3
S1PR3
SAA1
SAC3D1
SAE1
SAFB
SAMD11
SAMD4A
SAP30BP
SAR1A
SAXO2
SBSPON
SCAMP4
SCARF1
SCGB3A2
SCHIP1
SCLY
SCML1
SCN1A
SCN3B
SCNN1A
SCO2
SCRN2
SCYL1
SDC4
SDK1
SDK2
SEC11A
SEC24C
SEC24D
SEH1L
SEL1L2
SEL1L3
SELENOV
SEMA3D
SEMA4C
SEMA4G
SEPHS1
SEPTIN1
SEPTIN9
SERINC2
SERINC4
SERPINA4
SERPINA5
SERPINF1
SETP10
SEZ6
SF3B6
SFI1
SFPQ
SFRP4
SFTPA1
SFTPA2
SFXN3
SH2D3A
SH3BP5L
SH3RF2
SH3TC1
SHANK1
SHC1P2
SIDT1
SIDT2
SIGLEC8
SIM2
SIN3B
SIPA1L2
SIRPB1
SIVA1
SKIC8
SLC10A3
SLC11A2
SLC12A9
SLC16A3
SLC16A4
SLC17A4
SLC17A9
SLC22A17
SLC22A2
SLC22A8
SLC25A14
SLC25A15
SLC25A18
SLC25A19
SLC25A1P1
SLC25A29
SLC25A35
SLC25A45
SLC25A51P2
SLC25A6P1
SLC26A11
SLC26A8
SLC27A3
SLC27A5
SLC28A1
SLC28A2
SLC2A11
SLC30A3
SLC35B1
SLC35E1
SLC36A3
SLC37A1
SLC37A2
SLC37A3
SLC37A4
SLC39A5
SLC45A3
SLC46A3
SLC48A1
SLC4A2
SLC51A
SLC5A10
SLC5A11
SLC6A4
SLC9A3P1
SLC9A3P2
SLC9A3P3
SLC9A8
SLF2
SLFNL1
SLIRP
SLIT2
SLITRK2
SLU7
SLX4IP
SLX9
SMAD3
SMARCC2
SMARCD2
SMC1B
SMC4
SMC6
SMG5
SMIM12
SMIM5
SMLR1
SMPD4
SMPD4BP
SMTN
SMURF1
SMYD1
SNAP47
SNAPC4
SND1
SNED1
SNRK
SNRNP200
SNRNP40P1
SNTB2
SNTG2
SNUPN
SNX19
SNX19P1
SNX19P2
SNX19P3
SNX22
SORCS1
SP110
SP4
SPAG17
SPAG9
SPATA20
SPATA21
SPATA31A1
SPATA31A6
SPATA31B1P
SPATA31D5P
SPDYA
SPECC1L-ADORA2A
SPEF2
SPHK2
SPI1
SPIRE1
SPMIP2
SPON2
SPRN
SRARP
SRD5A3P1
SREBF2
SRL
SRRM2
SRSF8BP
SRSF8CP
SSC5D
SSR2
ST6GAL1
ST6GALNAC1
ST7L
STAB2
STARD8
STAT5A
STIM1
STK10
STK17B
STK24
STMN1
STMND1
STON2
STPG4
STRA6
STRC
STRCP1
STT3A
STX16-NPEPL1
STXBP5L
SULF1
SUPT6H
SUSD2
SUV39H1
SV2B
SVIL
SWAP70
SYCE2
SYMPK
SYNDIG1L
SYNE1
SYNGR3
SYNPO
SYT6
SYTL1
TACC2
TACO1
TAF1B
TANC1
TATDN2P3
TBATA
TBC1D1
TBC1D10B
TBC1D10C
TBC1D15
TBC1D2B
TBC1D8
TBX2
TBXA2R
TCAF1
TCAF2P1
TCAIM
TCEANC
TCEANC2
TCERG1L
TCF19
TCF7
TCHP
TCTN3
TECPR1
TECPR2
TECR
TEKT4
TET2
TEX2
TG
TGDS
TGFBI
TGFBR2
TGIF1
TGM2
TGM4
THAP12P3
THEM6
THG1L
THPO
THUMPD2
TIA1
TIAM2
TIMM17A
TIMM17B
TIRAP
TLCD5
TLE3
TLK2
TLL1
TLN1
TLR2
TM4SF18
TM9SF1
TMBIM6
TMC8
TMCO3
TMED2
TMED3
TMED5
TMEM108
TMEM120B
TMEM130
TMEM145
TMEM14B
TMEM163
TMEM169
TMEM18
TMEM184CP1
TMEM192
TMEM198
TMEM216
TMEM259
TMEM268
TMEM270
TMEM276
TMEM30B
TMEM37
TMEM53
TMEM94
TMOD1
TMPRSS13
TMPRSS9
TMTC2
TMUB2
TNC
TNFAIP8L3
TNFSF14
TNNC1
TNPO2
TNS4
TOGARAM1
TOM1
TOMM40L
TOP1MT
TOPORS
TOR2A
TOX2
TP53AIP1
TP53BP1
TP53I13
TP73
TPCN2
TPGS1
TRAF3IP3
TRAJ4
TRAPPC14
TRAV10
TRBV5-3
TRGV4
TRGV9
TRIM11
TRIM39
TRIM41
TRIM54
TRIM62
TRIM63
TRIO
TRIP6
TRMT44
TRMU
TROAP
TRPM5
TRPV2
TRPV3
TSC22D3
TSHZ1
TSKU
TSPAN4
TSPY20P
TSPY21P
TSPY23P
TSPYL2
TTC16
TTC39C
TTC3P1
TTC4
TTC7B
TTI2
TTPAL
TUBA3D
TUBA3FP
TUBAP12
TUBB3P1
TUT4
TXNDC11
TXNDC15
UBA7
UBE2F-SCLY
UBE2O
UBE2Z
UBE3AP2
UBFD1
UBQLN4P2
UBR5
UCK1
UFSP2
UGT1A10
UGT2B28
UNC13A
UNC45A
UNC5B
UNC93B1
UPK1B
UPK3BL1
UROS
USE1
USH1C
USP15
USP16
USP31
USP34
USP38
USP40
USP53
USP9X
UTP14C
UTP25
VAMP3
VASH1
VAV2
VAV3
VCAN
VDAC1P11
VDAC1P8
VEGFA
VIPAS39
VIPR1
VMP1
VN1R110P
VN1R12P
VN1R3
VN1R32P
VN1R38P
VN1R53P
VN1R64P
VN1R68P
VN1R78P
VN1R92P
VPS26C
VPS35L
VPS39
VPS51
VSIG10
VSTM5
VWA1
VWA7
VWFP1
WBP2
WDFY3
WDR1
WDR27
WDR45BP1
WDR54
WDR7
WDR74
WDR86
WDR89
WDR90
WIF1
WIPI2
WNK1
WNT10A
WNT9B
WRNIP1
XBP1
XIAP
XPO1
XPO6
XRCC6P4
YAF2
YAP1P1
YBX2
YEATS2
YIPF7
YLPM1
ZACN
ZAP70
ZBED1P1
ZBED5
ZBTB38
ZBTB7A
ZBTB7B
ZBTB9
ZC3H12A
ZC3H12D
ZCCHC8
ZDHHC5
ZDHHC8
ZFHX2
ZFHX3
ZFTRAF1
ZFYVE21
ZGPAT
ZHX3
ZKSCAN2
ZMIZ1
ZMYM4
ZMYND19
ZNF10
ZNF131
ZNF16
ZNF197
ZNF225
ZNF274
ZNF28
ZNF280D
ZNF285CP
ZNF304
ZNF311
ZNF331
ZNF335
ZNF341
ZNF362
ZNF384
ZNF385C
ZNF385D
ZNF469
ZNF487
ZNF488
ZNF506
ZNF551
ZNF598
ZNF641
ZNF665
ZNF668
ZNF669
ZNF701
ZNF705A
ZNF705G
ZNF736
ZNF736P1Y
ZNF736P2Y
ZNF736P3Y
ZNF74
ZNF75A
ZNF75D
ZNF799
ZNF829
ZNF83
ZNF836
ZNF875
ZNF877P
ZNF92P1Y
ZP2
ZPBP2
ZSCAN18
ZSWIM8
ZXDC
ZZEF1
TRIM26
TMEM147-AS1
H2AFJ
DGKG
ACTN1-AS1
KANTR
CAPN12
